# Supplementary material for: Examining predictors of cocaine withdrawal syndrome at the end of detoxification treatment in women with cocaine use disorder
Source: PubMed Central journal article supplement (PMC10805009; doi:10.1016/j.jpsychires.2023.11.043), 2024-01

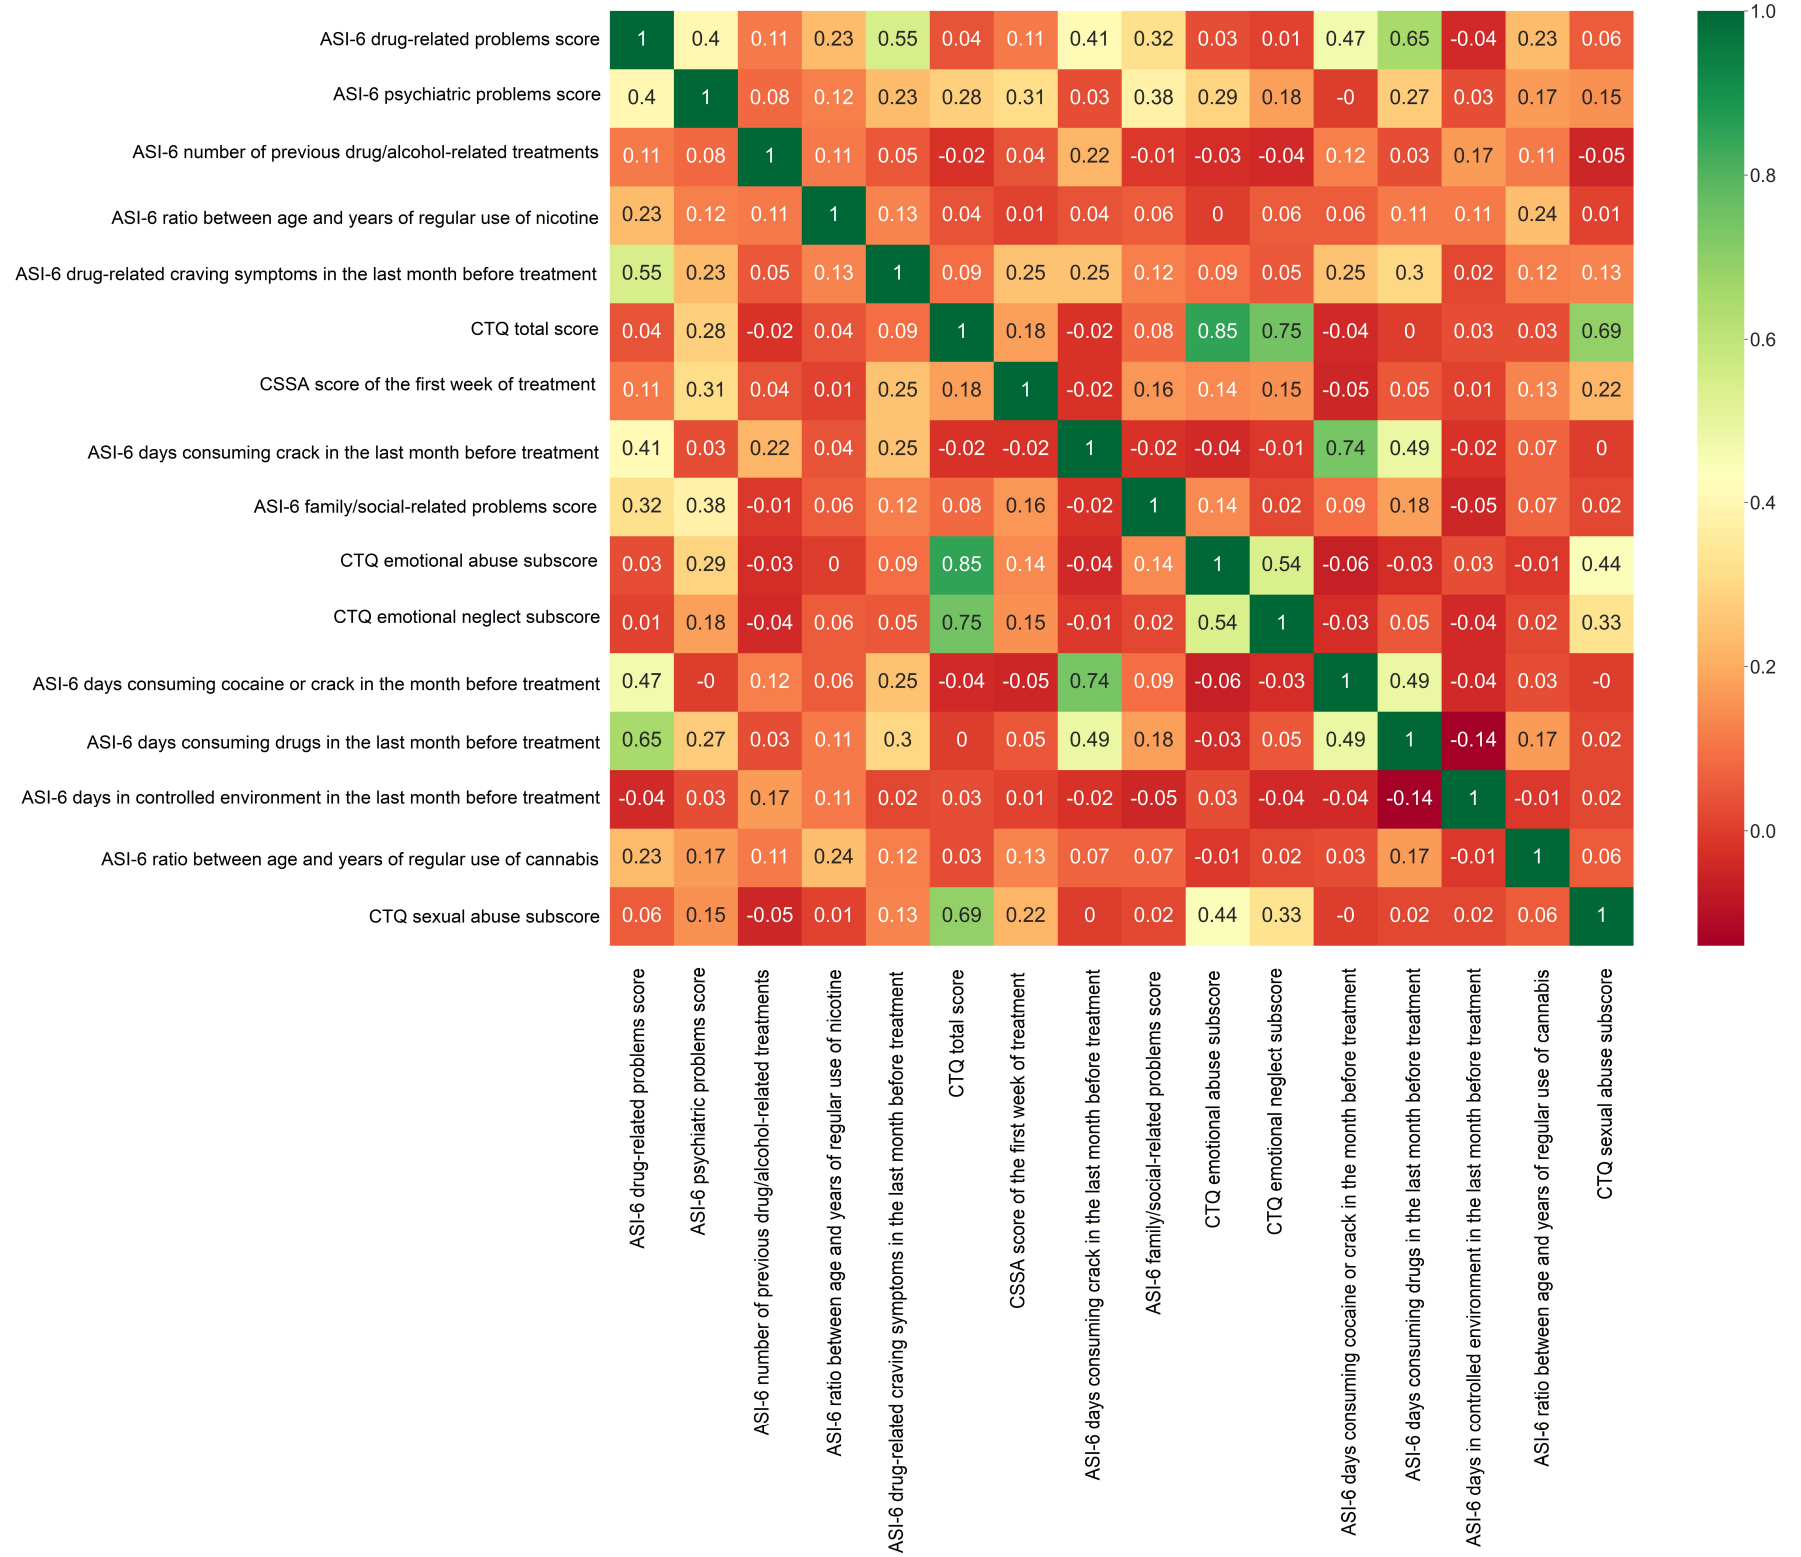

Supplement: mmc1.pdf [file mmc1.pdf]
